# Supplementary material for: A robust ex vivo experimental platform for molecular-genetic dissection of adult human neocortical cell types and circuits
Source: PubMed Central journal article supplement (PMC5976666; doi:10.1038/s41598-018-26803-9), 2018-05-30
Supplement: 41598_2018_26803_MOESM1_ESM.pdf [file 41598_2018_26803_MOESM1_ESM.pdf]

## Supplementary Material

### **A robust *ex vivo* experimental platform for molecular-genetic dissection of adult human neocortical cell types and circuits**

Jonathan T. Ting<sup>1</sup>, Brian Kalmbach<sup>1,2</sup>, Peter Chong<sup>1</sup>, Rebecca de Frates<sup>1</sup>, C. Dirk Keene<sup>3</sup>, Ryder P. Gwinn<sup>4</sup>, Charles Cobbs<sup>5</sup>, Andrew L. Ko<sup>6,7</sup>, Jeffrey G. Ojemann<sup>6,7</sup>, Richard G. Ellenbogen<sup>7</sup>, Christof Koch<sup>1</sup>, and Ed Lein<sup>1,7</sup>

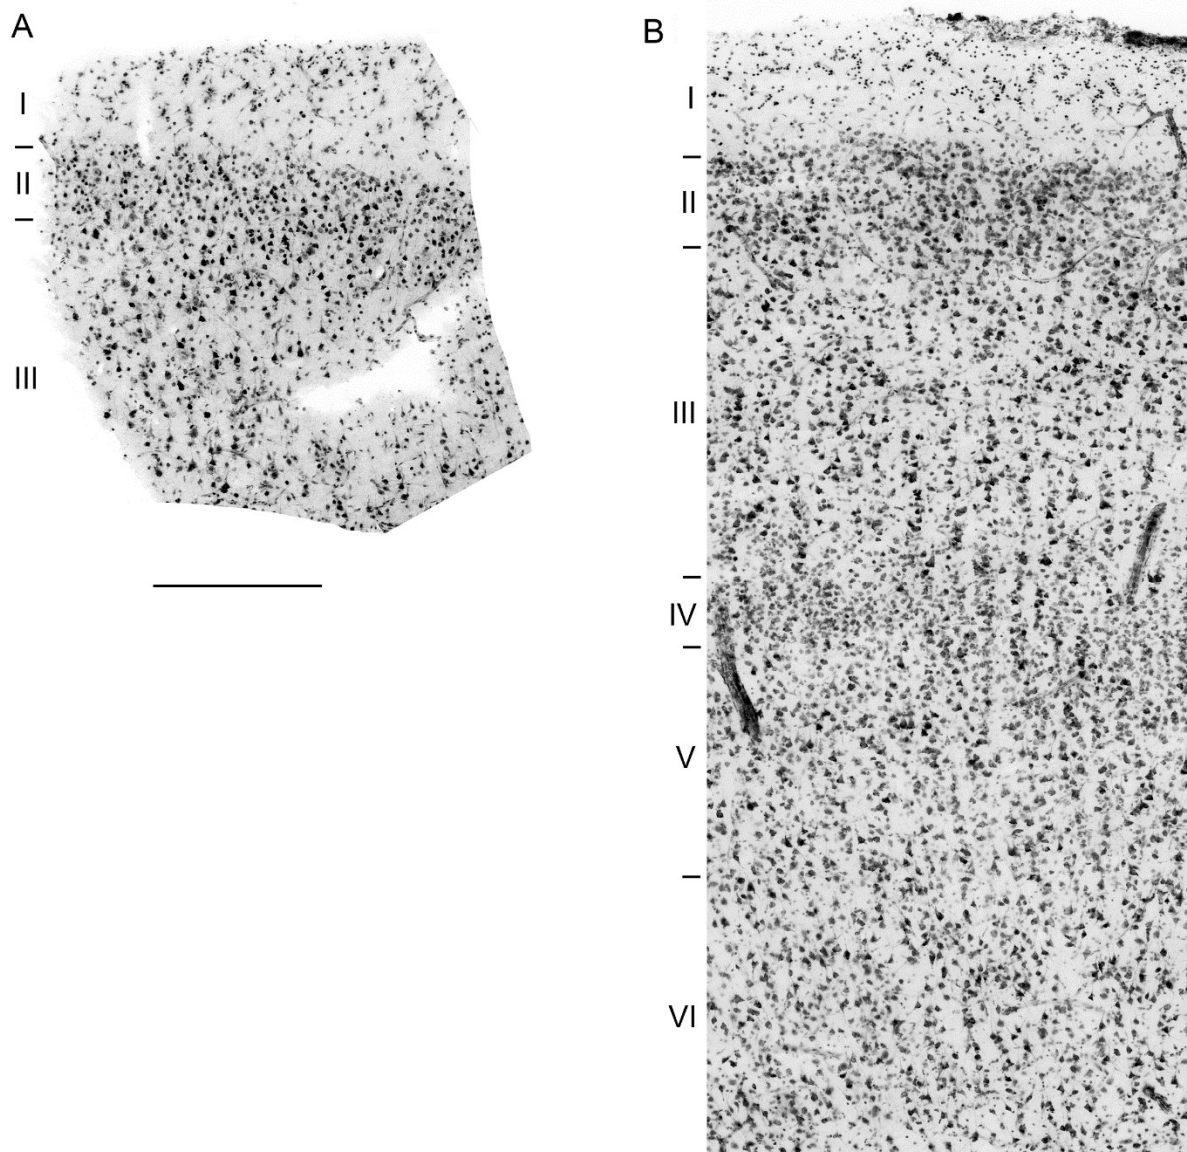

**Supplementary Figure S1: Laminar architecture is well-maintained, with no overt neuron loss after 72 hours of tissue incubation post-slicing.** (A) Nissl stain of a human neocortical brain slice fixed at 5 hr post-slicing. (B) Nissl stain on a human neocortical brain slice fixed at 72 hr post-slicing. Section thickness is 25  $\mu\text{m}$ . Layer boundaries are indicated. Scale bar (applies to panels A and B): 300  $\mu\text{m}$ . Note that the 5 hr slice dimensions were much smaller relative to the 72 hr slice from the outset; however, layers 2 and 3 are represented. All of the patch clamp recordings included in Figure 1 were carried out from these specific layers.

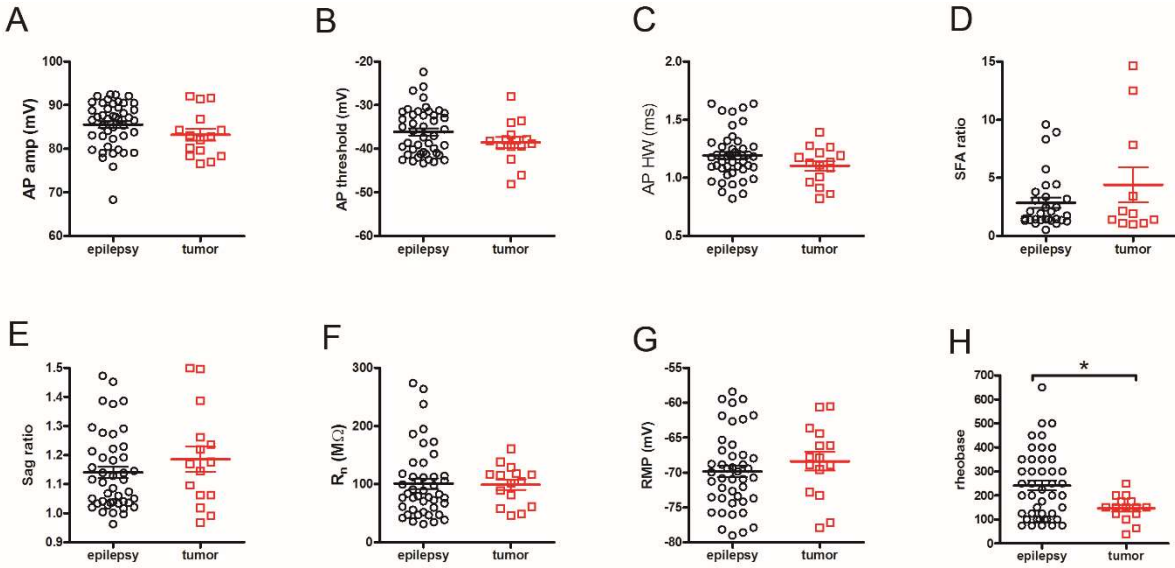

**Supplementary Figure S2: Comparison of Intrinsic membrane properties of neocortical pyramidal neurons in human *ex vivo* brain slices for tumor versus epilepsy cases.** (A-H) Plots of various electrophysiological features measured from 0-12 hours post-slicing for epilepsy versus tumor cases.  $R_n$ , input resistance; RMP, resting membrane potential; SFA, spike frequency adaptation; AP, action potential. Red squares correspond to neurons from tumor cases ( $n=11-15$ ); black circles correspond to neurons from epilepsy cases ( $n=30-44$ ). \*  $p < 0.05$ , Mann-Whitney U test.

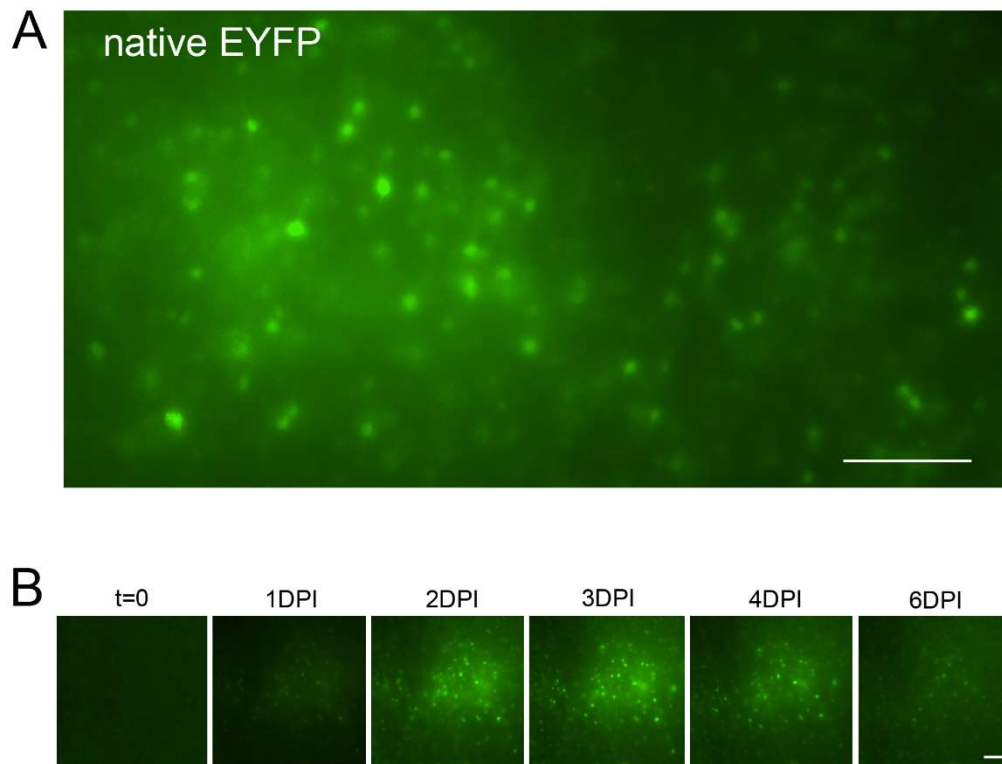

**Supplementary Figure S3: Time course of HSV-mediated transgene expression in human *ex vivo* brain slice cultures.** Live tissue native EYFP epifluorescence imaging of a 300  $\mu\text{m}$ -thick human neocortical brain slice in culture at 2 DIV/DPI following viral infection with HSV-CaMKII $\alpha$ -EYFP. Time course analysis with images collected using matched excitation exposure time (700 ms) to demonstrate the rapid onset and peak transgene expression time of 2-3 DPI following HSV transduction. Scale bars in A and B: 100  $\mu\text{m}$ .

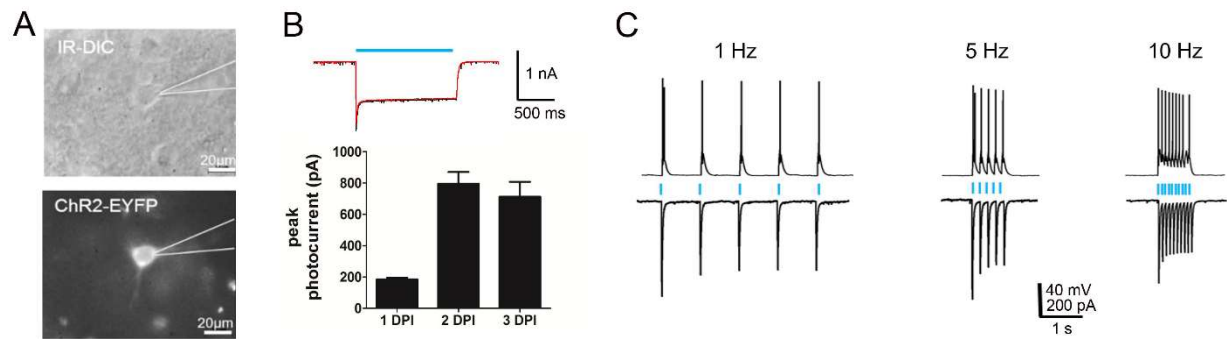

**Supplementary Figure S4: Functional manipulation of neuron firing with blue light following viral expression of ChR2-EYFP.** (A) IR-DIC image (top) and epifluorescence image (bottom) of a human neocortical pyramidal neuron infected with HSV-ChR2-EYFP. (B) Representative trace (top) and summary plot (bottom) of peak photocurrent amplitude evoked by blue light at 1, 2, and 3 days post virus infection ( $n=3-6$  neurons). (C) Blue light-evoked action potential firing (top) and photocurrents (bottom) recorded from the same neuron at 1, 5, and 10 Hz stimulation frequency. These data were derived from a single surgical specimen.

**Supplementary Movie S1: Spontaneous and carbachol-evoked Ca<sup>2+</sup>-transients in human hippocampal dentate gyrus granule cells infected with HSV-GCaMP6s, related to analysis shown in Figure 6b.** Playback is 3x faster than real time. Baseline spontaneous activity and the timing of two successive bouts of carbachol-evoked activity are indicated with subtitles. Imaging was performed at 4 DIV/DPI.
